# Supplementary material for: Screening adequacy of unstained thyroid fine needle aspiration samples using a deep learning-based classifier
Source: PubMed Central journal article supplement (PMC10439921; doi:10.1038/s41598-023-40652-1), 2023-08-19
Supplement: 41598_2023_40652_MOESM1_ESM.pdf [file 41598_2023_40652_MOESM1_ESM.pdf]

### MTL

### Faster R-CNN

### MTL + FASTER R-CNN

TP = 5  
FP = 0  
FN = 2

TP = 2  
FP = 1  
FN = 5

TP = 2  
FP = 1  
FN = 5

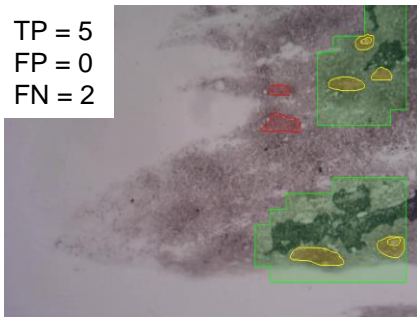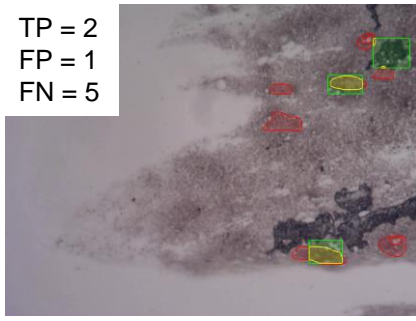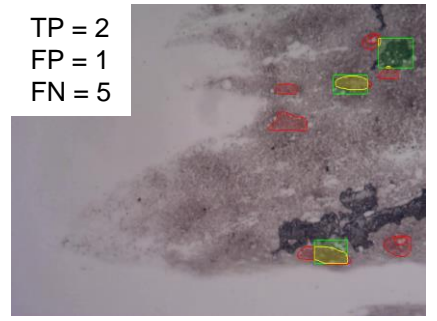

TP = 4  
FP = 3  
FN = 0

TP = 1  
FP = 2  
FN = 3

TP = 1  
FP = 2  
FN = 3

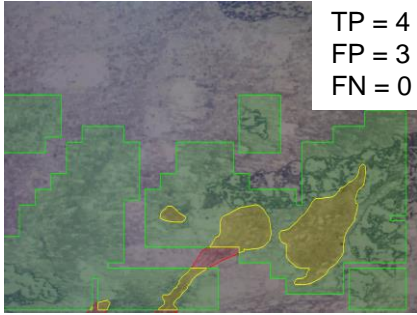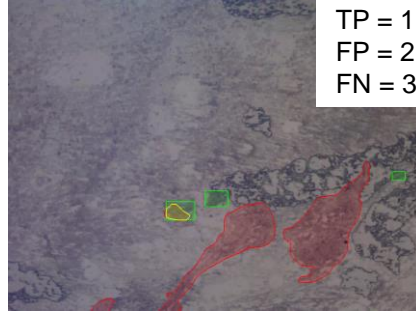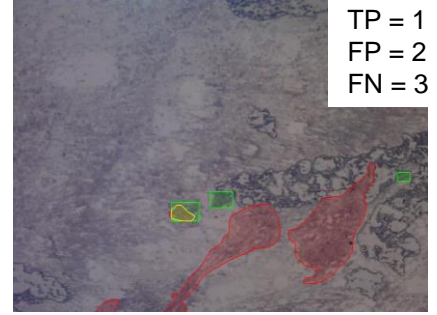

TP = 2  
FP = 0  
FN = 6

TP = 1  
FP = 0  
FN = 7

TP = 1  
FP = 0  
FN = 7

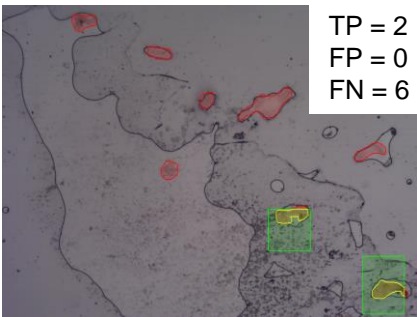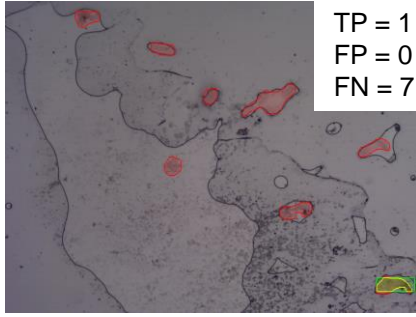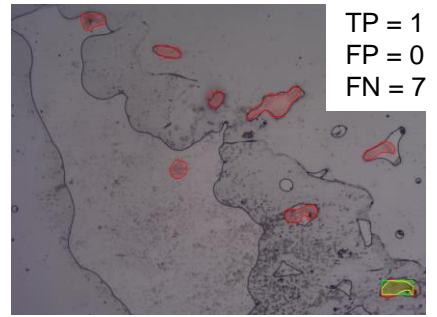

TP = 1  
FP = 1  
FN = 1

TP = 1  
FP = 0  
FN = 1

TP = 1  
FP = 0  
FN = 1

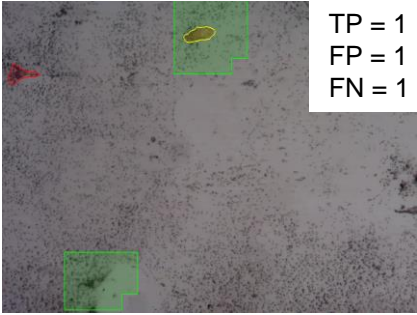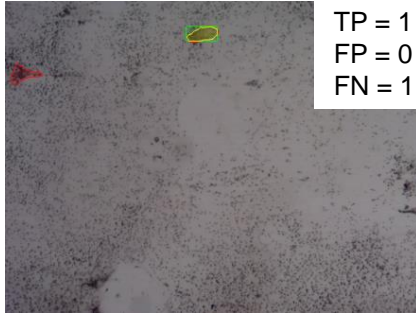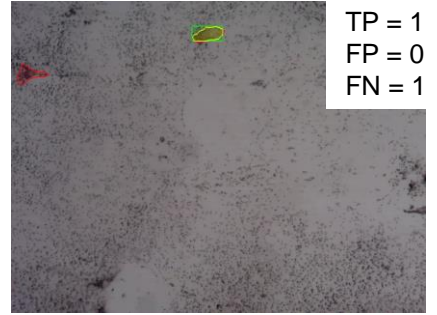

TP = 0  
FP = 0  
FN = 0

TP = 0  
FP = 1  
FN = 0

TP = 0  
FP = 0  
FN = 0

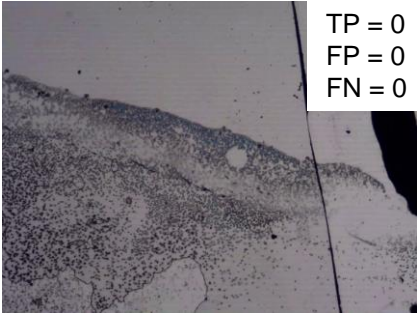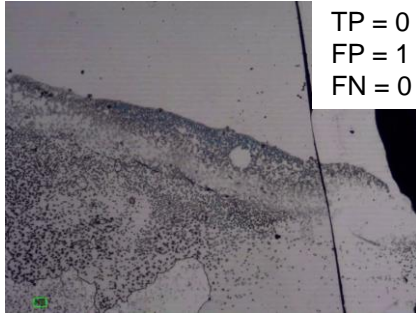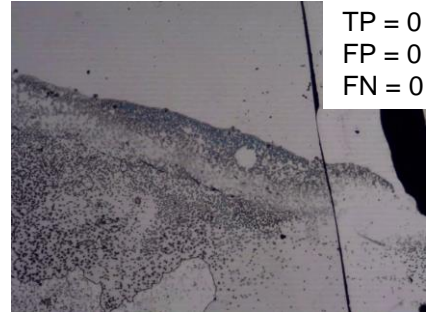

TP = 0  
FP = 0  
FN = 0

TP = 0  
FP = 1  
FN = 0

TP = 0  
FP = 0  
FN = 0

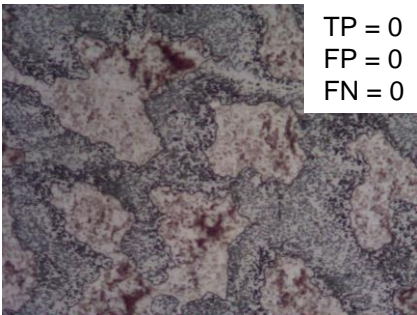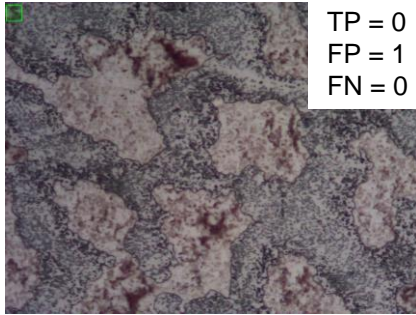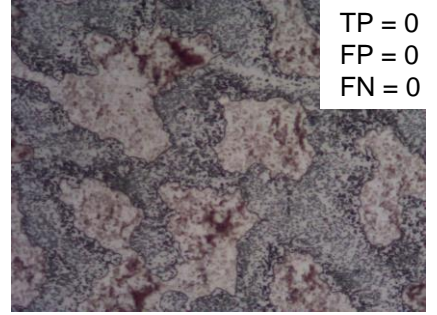

Ground Truth Prediction Overlap

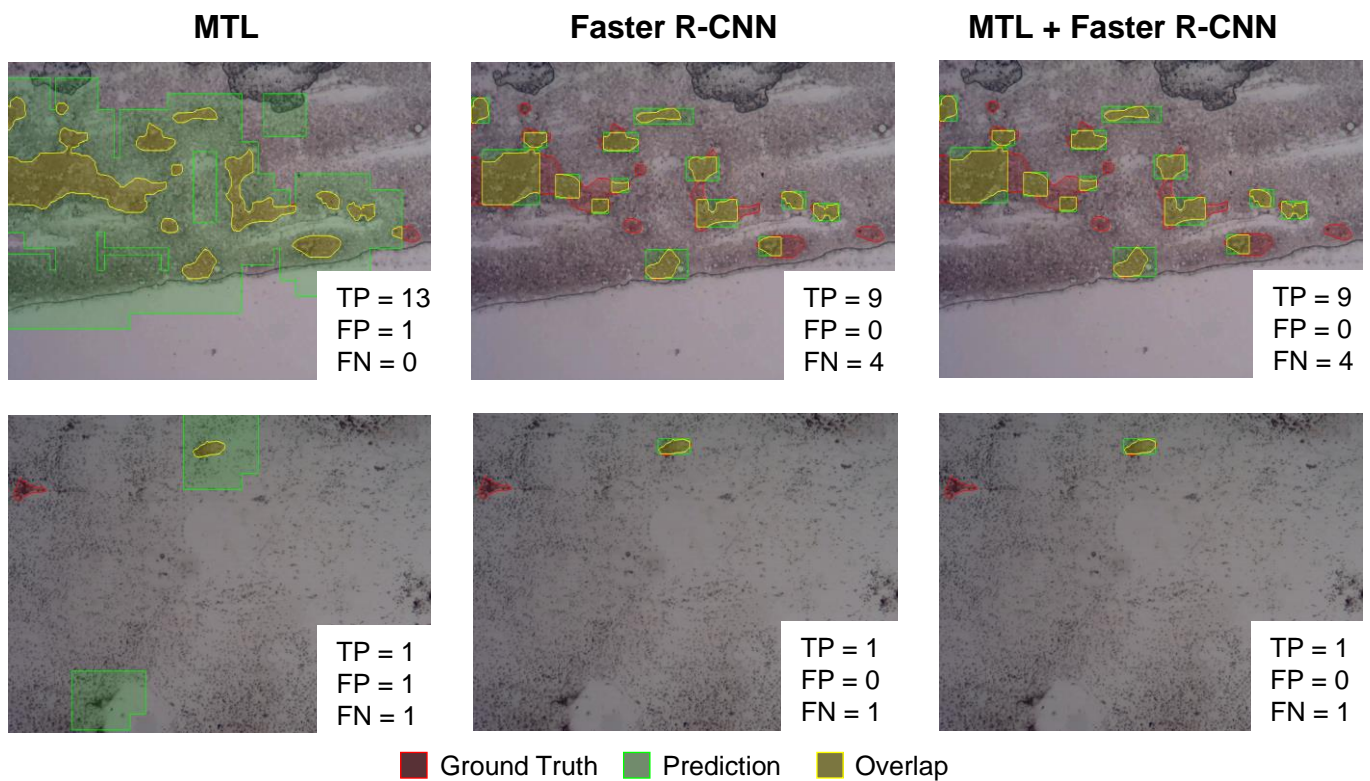

**Supplementary Figure 1. Comparison of follicular cluster detection by MTL, Faster R-CNN and FNA-Net, related to Figure 3.** The first column is the follicular cluster detection by the MTL model. The second column is the follicular cluster detection by the Faster R-CNN model. The third or last column is the follicular cluster detection by combining predictions from MTL and Faster R-CNN models. In the corner of each image, the number of true positives, false positives and false negatives are indicated next to the letters TP, FP, and FN, respectively. Each row has the same underlying image with the same ground truth. The ground truth is colored red, detection by the model is colored green, and the overlap between ground truth and detection is colored yellow.

MTL

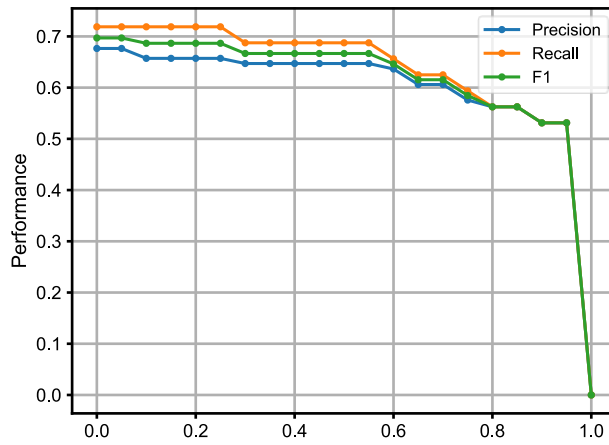

Faster RCNN

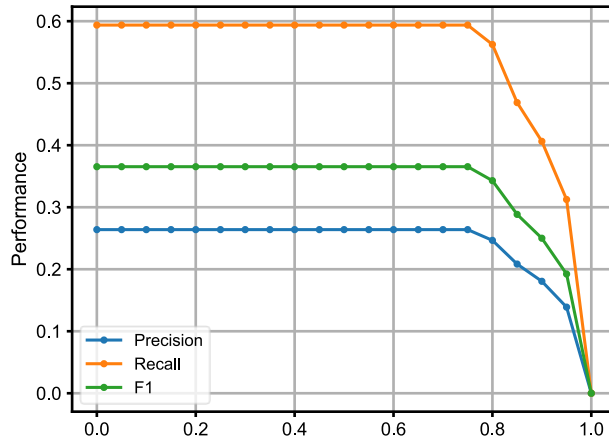

FNA-Net

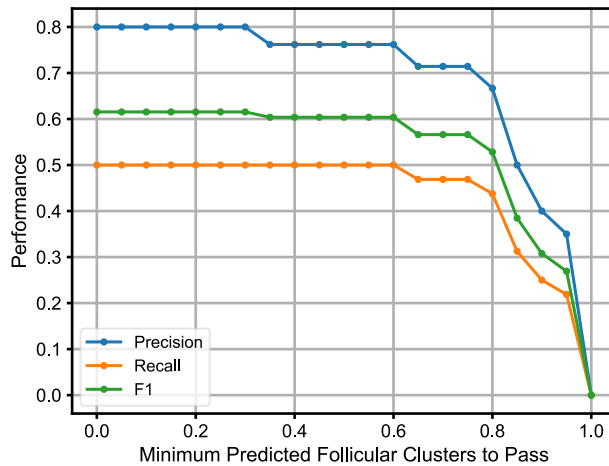

**Supplementary Figure 2. Effect of changing overlap threshold for detection status.** Overlap threshold varies from 1 pixel (0%) to 100%. The first, second, and third row represents the follicular cluster detection by the MTL model, the Faster R-CNN and FNA-Net, respectively. Performance in one of the fold in the 7-fold cross validation is shown but the trend that the performance increases as overlap threshold decreases is the same for all other folds.
