# Supplementary material for: Screening adequacy of unstained thyroid fine needle aspiration samples using a deep learning-based classifier
Source: PubMed Central journal article supplement (PMC10439921; doi:10.1038/s41598-023-40652-1), 2023-08-19
Supplement: 41598_2023_40652_MOESM2_ESM.pdf [file 41598_2023_40652_MOESM2_ESM.pdf]

## Supplementary Information: Statistical Testing (P-values)

**Supplementary Table S1.** P-values (Fig. 3a) of model comparisons for different performance measures by two-sided Wilcoxon signed-rank test.

| Mode Comparison | Precision | Recall | F1    | IOU   |
|-----------------|-----------|--------|-------|-------|
| 6 vs. 4         | 0.219     | 0.686  | 0.031 | 0.016 |
| 6 vs. 3         | 0.156     | 0.016  | 0.938 | 0.031 |
| 6 vs. 2         | 0.109     | 0.249  | 0.813 | 0.031 |
| 6 vs. 5         | 0.297     | 0.375  | 0.813 | 0.156 |
| 6 vs. 7         | 0.297     | 0.893  | 0.688 | 0.297 |
| 6 vs. 1         | 0.031     | 0.345  | 0.078 | 0.016 |
| 4 vs. 3         | 0.688     | 0.028  | 0.469 | 0.297 |
| 4 vs. 2         | 0.813     | 0.249  | 0.938 | 0.156 |
| 4 vs. 5         | 0.688     | 0.463  | 0.297 | 0.047 |
| 4 vs. 7         | 0.047     | 0.813  | 0.016 | 0.016 |
| 4 vs. 1         | 1.000     | 0.345  | 0.375 | 0.578 |
| 3 vs. 2         | 0.813     | 0.500  | 0.688 | 0.578 |
| 3 vs. 5         | 0.219     | 0.116  | 0.938 | 0.297 |
| 3 vs. 7         | 0.047     | 0.028  | 0.938 | 0.031 |
| 3 vs. 1         | 0.469     | 0.068  | 0.109 | 0.688 |
| 2 vs. 5         | 0.109     | 0.345  | 0.938 | 0.078 |
| 2 vs. 7         | 0.016     | 0.075  | 0.938 | 0.078 |
| 2 vs. 1         | 0.469     | 0.156  | 0.297 | 0.813 |
| 5 vs. 7         | 0.078     | 0.144  | 0.688 | 0.047 |
| 5 vs. 1         | 0.297     | 0.116  | 0.219 | 0.375 |
| 7 vs. 1         | 0.016     | 0.753  | 0.078 | 0.016 |

**Supplementary Table S2.** P-values (Fig. 3c) of model comparisons for different performance measures by two-sided Wilcoxon signed-rank test.

| Mode Comparison          | Precision | Recall | F1     | IOU    |
|--------------------------|-----------|--------|--------|--------|
| MTL vs. Faster R-CNN     | 0.0469    | 0.6002 | 0.0313 | 0.0156 |
| MTL vs. FNA-Net          | 0.2969    | 0.0277 | 0.0313 | 0.0156 |
| Faster R-CNN vs. FNA-Net | 0.0156    | 0.0156 | 0.2969 | 0.1563 |

**Supplementary Table S3.** P-values (Fig. 5e) of AUC comparisons by two-sided Wilcoxon signed-rank test.

| Threshold | Mode Comparison | Precision |
|-----------|-----------------|-----------|
| 6         | MTL vs RCNN     | 0.078     |
| 6         | RCNN vs FNA-Net | 0.016     |
| 6         | MTL vs FNA-Net  | 0.578     |
| 10        | MTL vs RCNN     | 0.219     |
| 10        | RCNN vs FNA-Net | 0.047     |

|    |                |       |
|----|----------------|-------|
| 10 | MTL vs FNA-Net | 0.375 |
|----|----------------|-------|

**Supplementary Table S4.** P-values (**Fig. 5f.**) of F1 comparisons by two-sided Wilcoxon signed-rank test.

| Threshold | Mode Comparison | Precision |
|-----------|-----------------|-----------|
| 6         | MTL vs RCNN     | 0.0313    |
| 6         | RCNN vs FNA-Net | 0.0156    |
| 6         | MTL vs FNA-Net  | 0.1563    |
| 10        | MTL vs RCNN     | 0.0313    |
| 10        | RCNN vs FNA-Net | 0.0156    |
| 10        | MTL vs FNA-Net  | 0.1094    |
